# Supplementary material for: A photo-inducible protein–inorganic nanoparticle assembly for active targeted tumour theranostics
Source: Royal Society of Chemistry journal article supplement (doi:10.1039/c9nr01120j), 2019-01-01
Supplement: c9nr01120j1.pdf [file c9nr01120j1.pdf]

## Photo-inducible protein-inorganic nanoparticle assembly for active targeted tumour theranostics

Jinbing Xie<sup>a,b,f,\*</sup>, Ling Mei<sup>a</sup>, Kai Huang<sup>c</sup>, Yuxiang Sun<sup>a</sup>, Aarushi Iris<sup>c</sup>, Baoliang Ma<sup>d</sup>, Yining Qiu<sup>e</sup>, Junjie Li<sup>f</sup>, Gang Han<sup>c,\*</sup>

---

<sup>a</sup> Department of Biomedical Engineering, College of Engineering and Applied Sciences, Nanjing University, 210093, China.

<sup>b</sup> Department of Chemical Engineering and Materials Science, Wayne State University, Michigan, 48202, USA.

<sup>c</sup> Department of Biochemistry and Molecular Pharmacology and Neurobiology Department, University of Massachusetts Medical School, Worcester, Massachusetts 01605, USA.

<sup>d</sup> Department of Physics, Science of College, Nanjing Agricultural University, Nanjing 210095, PR China.

<sup>e</sup> Department of Pediatrics, Union Hospital, Tongji Medical College, Huazhong University of Science and Technology, Wuhan 430022, China.

<sup>f</sup> Innovation Center of NanoMedicine (iCONM), Kawasaki Institute of Industrial Promotion, 3-25-14 Tonomachi, Kawasaki-ku, Kawasaki 210-0821, Japan

\* Corresponding author: E-mail: xiejb@nju.edu.cn or Gang.Han@umassmed.edu

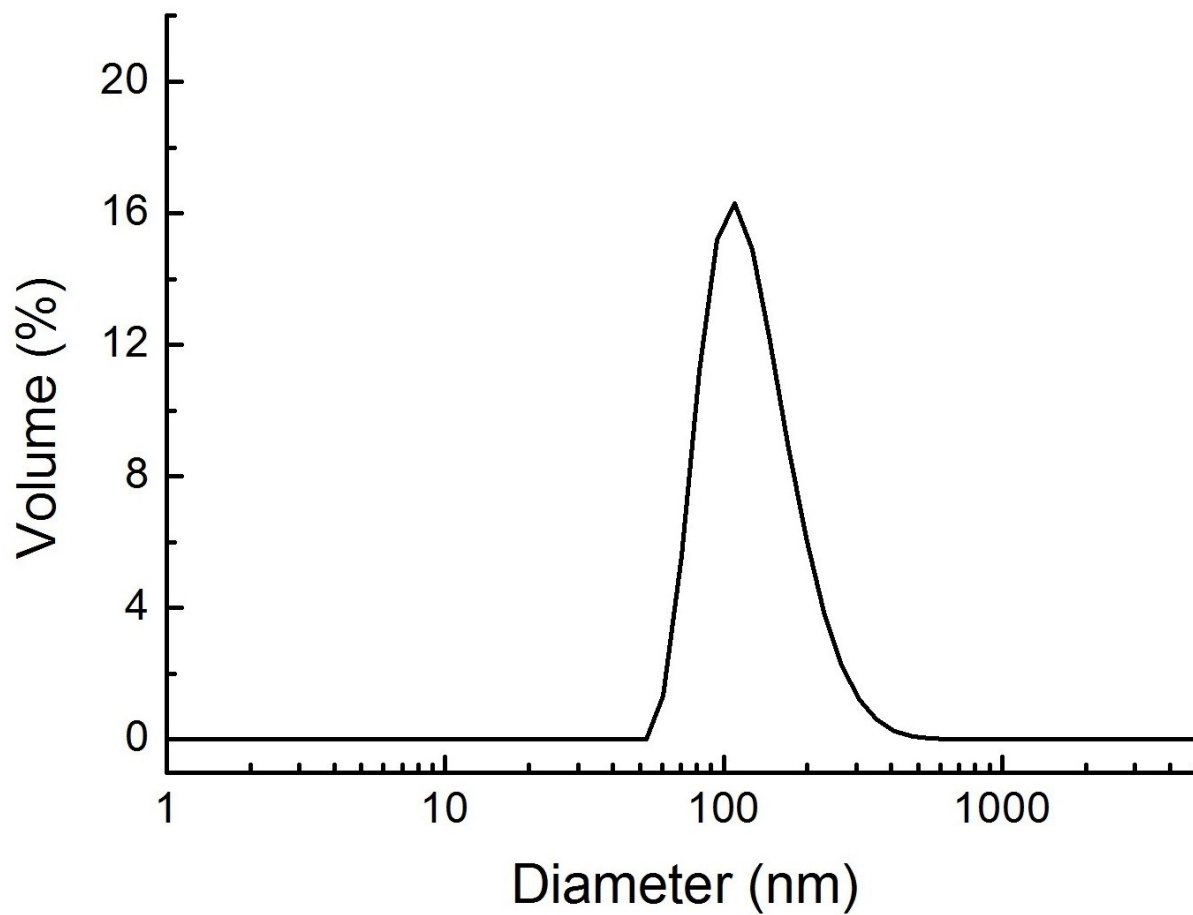

**Figure S1:** The DLS particle size profiles for the LYS-PTX-QDs nanoparticles. The nanoparticles were prepared with 2 mg/mL LYS, 0.35 mg/mL PTX, and 2  $\mu\text{g/mL}$  QDs, with UV illumination at 2  $\text{mW/cm}^2$  for 6 minutes.

**Table S1.** Particle size and polydispersity index (PDI) of *in vitro* and *in vivo* used protein and protein-inorganic hybrid nanoparticles as determined by DLS.

| nanoparticles        | Size (nm) | PDI   |
|----------------------|-----------|-------|
| LYS/NPs              | 77.5      | 0.128 |
| LYS-QDs/NPs          | 90.8      | 0.146 |
| LYS-QDs-cRGD/NPs     | 91.7      | 0.152 |
| LYS-PTX-QDs /NPs     | 95.4      | 0.134 |
| LYS-PTX-QDs-cRGD/NPs | 97.5      | 0.143 |

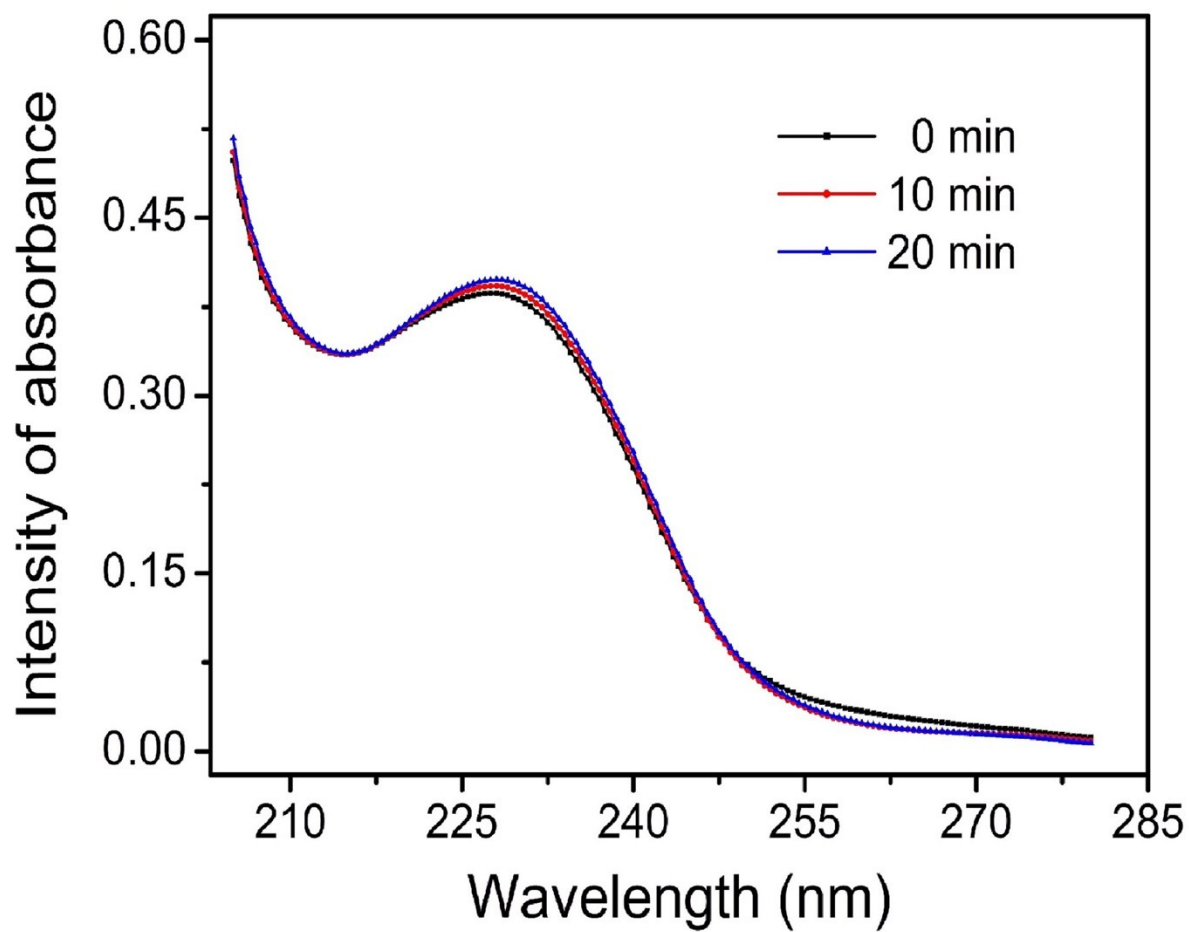

**Figure S2:** The absorbance spectra of 0.05 mg/mL PTX with UV illumination ( $2 \text{ mW/cm}^2$ ) for 0, 10, and 20 minutes.
